# Supplementary material for: Fungal and Bacterial Communities in the Rhizosphere of Pinus tabulaeformis Related to the Restoration of Plantations and Natural Secondary Forests in the Loess Plateau, Northwest China
Source: Hindawi journal article supplement (doi:10.1155/2013/606480), 2013-01-01
Supplement: f1 [file 606480.f1.zip]

Archive with 2 entries (2 files):
- Supplementary material (A).pdf
- Supplementary material (B).pdf
